# Supplementary material for: CNT encapsulated MnOx for an enhanced flow-through electro-Fenton process: the involvement of Mn(iv)
Source: Royal Society of Chemistry journal article supplement (doi:10.1039/d2ta03445j), 2022-01-01
Supplement: d2ta03445j1.pdf [file d2ta03445j1.pdf]

## **Supplementary Information**

### **CNT Encapsulated MnO<sub>x</sub> for Enhanced Flow-Through Electro-Fenton: The Involvement of Mn(IV)**

Dongli Guo<sup>a</sup>, Shengtao Jiang<sup>b</sup>, Limin Jin<sup>a</sup>, Kui Huang<sup>c\*</sup>, Ping Lu<sup>d</sup>, Yanbiao Liu<sup>a, e\*</sup>

<sup>a</sup> *Textile Pollution Controlling Engineering Center of Ministry of Environmental Protection, College of Environmental Science and Engineering, Donghua University, Shanghai 201620, China. E-mail: yanbiaoliu@dhu.edu.cn, Tel: +86 21 67798752.*

<sup>b</sup> *College of Life Science, Taizhou University, Taizhou 318000, China.*

<sup>c</sup> *School of Resources, Environment and Materials, Guangxi University, 100 Daxue Road, Nanning 530004, China. E-mail: khuang@gxu.edu.cn.*

<sup>d</sup> *Research Center for Analysis and Measurement, Donghua University, Shanghai 201620, China.*

<sup>e</sup> *Shanghai Institute of Pollution Control and Ecological Security, 1239 Siping Road, Shanghai 200092, China.*

## Table of Contents

|                                                                                                                                                                                                                                                                                                                                                          |     |
|----------------------------------------------------------------------------------------------------------------------------------------------------------------------------------------------------------------------------------------------------------------------------------------------------------------------------------------------------------|-----|
| <b>Text S1</b> Reagents and materials .....                                                                                                                                                                                                                                                                                                              | S4  |
| <b>Text S2</b> Preparation of MnO <sub>x</sub> -in-CNT and MnO <sub>x</sub> -out-CNT filters.....                                                                                                                                                                                                                                                        | S4  |
| <b>Text S3</b> Calculation of H <sub>2</sub> O <sub>2</sub> flux .....                                                                                                                                                                                                                                                                                   | S5  |
| <b>Text S4</b> Computational methods.....                                                                                                                                                                                                                                                                                                                | S5  |
| <b>Text S5</b> Calculation of energy consumption.....                                                                                                                                                                                                                                                                                                    | S6  |
| <b>Table S1</b> HPLC operation parameters for different substrates. ....                                                                                                                                                                                                                                                                                 | S7  |
| <b>Table S2</b> Comparison of the BPA degradation efficiency in the proposed system with reported literature. ....                                                                                                                                                                                                                                       | S8  |
| <b>Table S3</b> Comparison of the performance of the proposed system with reported Mn-based catalysts. ....                                                                                                                                                                                                                                              | S9  |
| <b>Table S4</b> Quality parameters of different water. ....                                                                                                                                                                                                                                                                                              | S10 |
| <b>Table S5</b> Chemicals used as model organic pollutants.....                                                                                                                                                                                                                                                                                          | S11 |
| <b>Fig. S1</b> Schematic representation of the flow-through electroactive filtration reactor. ....                                                                                                                                                                                                                                                       | S12 |
| <b>Fig. S2</b> Schematic illustration of the flow-through electro-Fenton system.....                                                                                                                                                                                                                                                                     | S13 |
| <b>Fig. S3</b> HRTEM image of MnO <sub>x</sub> -in-CNT filter.....                                                                                                                                                                                                                                                                                       | S14 |
| <b>Fig. S4</b> (a) TEM image of CNT with closed tip; (b) TEM image of MnO <sub>x</sub> -out-CNT filter (Inset) HRTEM image of MnO <sub>x</sub> nanoparticles; (c) HAADF-STEM image of MnO <sub>x</sub> -out-CNT filter; (d) EDS mapping pattern with C, O, and Mn elements overlapping together; EDS elemental mapping of (d) C, (e) O, and (f) Mn. .... | S15 |
| <b>Fig. S5</b> (a) XPS wide scan survey spectra and (b) high-resolution Mn 2p spectra of different catalysts.....                                                                                                                                                                                                                                        | S16 |
| <b>Fig. S6</b> XRD patterns of CNT, MnO <sub>x</sub> -in-CNT, and MnO <sub>x</sub> -out-CNT.....                                                                                                                                                                                                                                                         | S17 |
| <b>Fig. S7</b> N <sub>2</sub> adsorption–desorption isotherms of MnO <sub>x</sub> -out-CNT and MnO <sub>x</sub> -in-CNT...S18                                                                                                                                                                                                                            |     |
| <b>Fig. S8</b> CV curves of CNT filter in O <sub>2</sub> - and N <sub>2</sub> -saturated 50 mM Na <sub>2</sub> SO <sub>4</sub> solution. ....                                                                                                                                                                                                            | S19 |
| <b>Fig. S9</b> Effect of MnO <sub>x</sub> loading on BPA degradation. ....                                                                                                                                                                                                                                                                               | S20 |
| <b>Fig. S10</b> Zeta potential of MnO <sub>x</sub> versus solution pH.....                                                                                                                                                                                                                                                                               | S21 |
| <b>Fig. S11</b> Effect of (a) DO and (b) flow rate on BPA degradation. ....                                                                                                                                                                                                                                                                              | S22 |

|                                                                                                                                                                                                |     |
|------------------------------------------------------------------------------------------------------------------------------------------------------------------------------------------------|-----|
| <b>Fig. S12</b> Decline of PMSO and production of PMSO <sub>2</sub> in the MnO <sub>x</sub> -in-CNT electro-Fenton system. ....                                                                | S23 |
| <b>Fig. S13</b> XPS spectrogram and the fitting peak of Mn 2p of after used MnO <sub>x</sub> -in-CNT filter. ....                                                                              | S24 |
| <b>Fig. S14</b> Mass spectrum of BPA and intermediates during the BPA removal in MnO <sub>x</sub> -in-CNT electro-Fenton system. ....                                                          | S25 |
| <b>Fig. S15</b> (a) The geometrical structure of BPA, (b) electrostatic potential (ESP) map of BPA, and (c) natural population analysis (NPA) charge distribution and Fukui index of BPA. .... | S26 |
| <b>Fig. S16</b> TOC removal in the MnO <sub>x</sub> -in-CNT electro-Fenton system. ....                                                                                                        | S27 |
| <b>Fig. S17</b> Effect of co-existing substrates on the degradation of BPA by MnO <sub>x</sub> -in-CNT electro-Fenton system. ....                                                             | S28 |
| <b>Fig. S18</b> Effect of different water matrices on the degradation of BPA. ....                                                                                                             | S29 |
| <b>Fig. S19</b> The performance of trace BPA degradation in the MnO <sub>x</sub> -in-CNT electro-Fenton systems. ....                                                                          | S30 |
| <b>Fig. S20</b> Degradation of various organic pollutants in the MnO <sub>x</sub> -in-CNT electro-Fenton system. ....                                                                          | S31 |
| <b>Fig. S21</b> A comparison of BPA degradation stability and leached total Mn concentration of the MnO <sub>x</sub> -in-CNT or MnO <sub>x</sub> -out-CNT electro-Fenton systems. ....         | S32 |
| <b>Fig. S22</b> Flow path of the MnO <sub>x</sub> -in-CNT electro-Fenton system. ....                                                                                                          | S33 |
| <b>References</b> .....                                                                                                                                                                        | S34 |

### **Text S1 Reagents and materials**

Bisphenol A (BPA, >99.8%), sulfamethoxazole (SMX, 98.0%), 2,4,6-trichlorophenol (2,4,6-TCP, 98.0%), 4-chlorophenol (4-CP, ≥99%), phenol (99%), aniline (≥99%), methylene blue (MB, ≥97.0%), rhodamine B (RhB, ≥99%), benzoic acid (BA, 99.5%), 2,2,6,6-tetramethylpiperidine (TEMP, ≥98.0%), 5,5-dimethyl-1-pyrrolidine-N-oxide (DMPO, 97.0%), pyrophosphate (PP, 99.0%), and methyl phenyl sulfoxide (PMSO, >98.0%) were obtained from Shanghai Aladdin Biological Technology Co., Ltd. (China).  $Mn(NO_3)_2$  (50%, w/w aq.) was purchased from Alfa Aesar Chemical Reagent Co., Ltd. (China). Nitric acid ( $HNO_3$ , 65.0~68.0%), sodium hydroxide (NaOH, ≥96.0%), sodium silicate ( $Na_2SiO_3 \cdot 9H_2O$ , ≥98.0%), sodium chloride (NaCl, ≥98.0%), sodium sulfate ( $Na_2SO_4$ , ≥99.0%), sodium nitrate ( $NaNO_3$ , ≥98.5%), levofloxacin (LFX), furfuryl alcohol (FFA, ≥98.5%), *tert*-butyl alcohol (TBA, ≥98.0%), *p*-benzoquinone (*p*-BQ, ≥98.0%), tetracycline (TC, ≥98.0%), and ethanol (≥96.0%) were purchased from Sinopharm Chemical Reagent Co. Ltd. (China). Methanol (≥99.9%), phosphoric acid, formic acid and acetonitrile (≥99.9%, chromatographic grade) were purchased from Titan Scientific Co., Ltd. (China). Multiwalled carbon nanotubes (CNTs) ( $\langle d \rangle = 10\text{-}20$  nm and  $\langle l \rangle = 0.5\text{-}2.0$   $\mu m$ ) were supplied by Nanjing XFNANO Materials Tech Co., Ltd. (China). All chemical reagents were used without any purification. Lake water, pharmaceutical wastewater and waste water treatment plant secondary effluent was collected from the Jingyue Lake of Donghua university campus, a hospital, and a waste water treatment plant of Shanghai, respectively. The wastewater characteristics were available in Table S1. Ultrapure water (resistivity ≥18.2 M $\Omega$  cm) was used in all experiments.

### **Text S2 Preparation of $MnO_x$ -in-CNT and $MnO_x$ -out-CNT filters**

The  $MnO_x$  nanoparticles were introduced into the CNT channels by a wet-chemistry method.<sup>1</sup> The detailed prepared processes are described as follows. Raw CNTs ( $\langle d \rangle = 10\text{-}20$  nm and  $\langle l \rangle = 0.5\text{-}2.0$   $\mu m$ , purchased from Xianfeng Nano Co. Ltd.) were first opened up by refluxing in  $HNO_3$  (65~68 wt. %) at 140 °C for 14 h. The metal catalyst residues were removed during this process. The resulting CNT were immersed into an aqueous  $Mn(NO_3)_2$  solution, which was introduced into the CNT channels

utilizing the capillary forces of CNT aided by ultrasonic treatment and stirring. After the resulting slurry mixture was dried at room temperature, it was gradually heated to 210°C and held for 1 h. By this process,  $\text{Mn}(\text{NO}_3)_2$  decomposes into  $\text{MnO}_x$  and the obtained sample is denoted as  $\text{MnO}_x$ -in-CNT.

For comparison, the same loadings of  $\text{MnO}_x$  were deposited on the outer surface of carbon nanotubes by impregnating CNT with aqueous  $\text{Mn}(\text{NO}_3)_2$  solution. These CNT with closed caps were obtained by refluxing raw CNT in 37 wt. %  $\text{HNO}_3$  solution at 110°C for 5 h. Then,  $\text{MnO}_x$ -out-CNT was obtained after the same drying procedure.

The hybrid filters and pristine CNT filter can be fabricated by a facile vacuum filtration route. Briefly, 30 mg of  $\text{MnO}_x$ -out-CNT,  $\text{MnO}_x$ -in-CNT or CNT powders were dispersed into 40 mL N-methyl-2-pyrrolidinone (NMP) and probe-sonicating for 40 min (100 W, LABSONIC® M, Sartorius) to achieve a homogeneous suspension solution. The mixture was then vacuum-filtered onto a polytetrafluoroethylene (PTFE) membrane and washed sequentially with 100 mL of ethanol and 200 mL of DI- $\text{H}_2\text{O}$  before use.

### Text S3 Calculation of $\text{H}_2\text{O}_2$ flux

The  $\text{H}_2\text{O}_2$  flux was evaluated in the absence of BPA, and the result was calculated by the following equation:<sup>2</sup>

$$\text{H}_2\text{O}_2 \text{ Flux} = \frac{(\text{H}_2\text{O}_2)(\text{mmol/L}) \times \text{flow rate(L/h)}}{\text{effective filter area (m}^2\text{)}} \quad (1)$$

where an *Effective filter area* represents the area that is permeable to a solution *i.e.*,  $7.1 \times 10^{-4} \text{ m}^2$ .

### Text S4 Computational methods

A CNT model with C-C bond length of 1.42 Å was constructed. The  $\text{MnO}_x$  cluster was constructed, and the structure was taken from  $\text{Mn}_5\text{O}_8$ , as it encompasses both trivalent and tetravalent Mn. The  $\text{MnO}_x$  was placed inside and outside the CNT, respectively, thus constituting the confined and unconfined model with a cell size of  $19.62 \times 17.22 \times 36.27$  and  $\alpha, \beta, \gamma$  all at 90°. CP2K 8.1<sup>3</sup> was used for the geometric optimization of the configuration and single-point energy calculations. The theoretical method was PBE<sup>4</sup> and the basis group was DZVP-MOLOPT-SR-GTH.<sup>5</sup> The OT

acceleration algorithm, DFT-D3 (BJ)<sup>5,6</sup> correction was used. In addition, Broyden mixing as density matrix mixing method were applied. Since the system already has more than 15 Å in the XYZ direction, only one  $\Gamma$  point was needed. The SCF convergence limit is set as  $5 \times 10^{-6}$ , and the cutoff and REL cutoff were set as 400 and 55 Ry, respectively. The binding energy is calculated according to the following formula:

$$E = (E_{\text{product}} - \sum n_i * E_{\text{atom}_i}) / n \quad (2)$$

where  $E$  is the binding energy,  $E_{\text{product}}$  is the energy of the product, which refers to the energy of the CNT binding the corresponding configurations such as  $\text{H}_2\text{O}_2$ ,  $\text{Mn(IV)}$ ,  $\text{HO}^\bullet$ ,  $\text{O}_2^{\bullet-}$ , etc.,  $E_{\text{atom}_i}$  is the energy of the atom  $i$  that constitutes the product,  $n_i$  is the number of  $i$  atoms, and  $n$  is the total number of atoms in the product.

The ab initio calculations were conducted using the Gaussian 09 package.<sup>7</sup> The geometry optimization and frequency calculation for the BPA molecule were carried out at the B3LYP/6-311G\* level. The Fukui functions representing the electrophilic ( $f^-$ ) were applied to unveil the active sites of the BPA molecule by Multiwfn.<sup>8</sup>

### Text S5 Calculation of energy consumption

The energy consumption was calculated in terms of per volume treated water ( $\text{kW h/m}^3$ ) or the removal of per gram BPA from the simulated wastewater sample ( $\text{kW h/g}$ ):<sup>9</sup>

$$\text{energy consumption} \left( \text{kW h m}^{-3} \right) = \frac{1000UIt}{V_0} \quad (3)$$

$$\text{energy consumption} \left( \text{kW h g}^{-1} \text{ BPA} \right) = \frac{UIt}{(C_0 - C_t)V_0} \quad (4)$$

where  $U$  is the applied voltage (V),  $I$  is the applied current (A),  $t$  represents the treatment time (h),  $V_0$  denotes the solution volume (L),  $C_0$  and  $C_t$  are the BPA concentration in the solution ( $\text{mg L}^{-1}$ ) at time 0 and  $t$ , respectively. Here, the electric energy consumption is converted accordingly to U.S. environmental prices (US\$) and the average electricity price is 14.31 cents per kWh (June, 2022).

**Table S1** HPLC operation parameters for different substrates.

| Substrates        | Methanol | Acetonitrile | DI (0.1% phosphoric acid) | DI | Detection wavelength (nm) | Flow rate (mL min <sup>-1</sup> ) |
|-------------------|----------|--------------|---------------------------|----|---------------------------|-----------------------------------|
| BPA               | 70       | -            | -                         | 30 | 230                       | 1.0                               |
| SMX               | 30       | -            | 70                        | -  | 300                       | 1.0                               |
| 4-CP              |          | 40           |                           | 60 | 210                       | 1.0                               |
| 2,4,6-TCP         | -        | 70           | 30                        | -  | 294                       | 1.0                               |
| TC                |          | 70           | 30                        |    | 280                       | 0.5                               |
| LFX               | -        | 85           | 15                        | -  | 293                       | 1.0                               |
| phenol            | 60       | -            | 40                        | -  | 270                       | 1.0                               |
| aniline           | 40       | -            |                           | 60 | 230                       | 0.5                               |
| BA                |          | 15           |                           | 85 | 270                       | 0.5                               |
| PMSO              |          | 20           |                           | 80 | 230                       | 0.8                               |
| PMSO <sub>2</sub> |          | 20           |                           | 80 | 215                       | 0.8                               |

**Table S2** Comparison of the BPA degradation efficiency in the proposed system with reported literature.

| Materials                                                | BPA concentration                 | Oxidant                       | Reaction time | pH  | Removal efficiency | References |
|----------------------------------------------------------|-----------------------------------|-------------------------------|---------------|-----|--------------------|------------|
| nFe <sub>2</sub> O <sub>3</sub> /MIL-53(Cu)              | 0.044 mM (10 mg L <sup>-1</sup> ) | H <sub>2</sub> O <sub>2</sub> | 120 min       | 5.0 | 77.2%              | 10         |
| RGO-CeO <sub>2</sub> -TNAs                               | 0.044 mM (10 mg L <sup>-1</sup> ) | H <sub>2</sub> O <sub>2</sub> | 120 min       | 5.0 | 81.8%              | 11         |
| AlgCMC-Fe                                                | 0.022 mM (5 mg L <sup>-1</sup> )  | H <sub>2</sub> O <sub>2</sub> | 240 min       | 7.0 | 87.0%              | 12         |
| Co <sub>3</sub> O <sub>4</sub> hollow nanospheres        | 0.175 mM (40 mg L <sup>-1</sup> ) | persulfate                    | 100 min       | 6.0 | 91.0%              | 13         |
| Cu(0.05)-AlPO <sub>4</sub>                               | 0.11 mM (25 mg L <sup>-1</sup> )  | H <sub>2</sub> O <sub>2</sub> | 180 min       | 7.0 | 92.0%              | 14         |
| Cu-Al <sub>2</sub> O <sub>3</sub>                        | 0.088 mM (20 mg L <sup>-1</sup> ) | H <sub>2</sub> O <sub>2</sub> | 180 min       | 7.0 | 87.0%              | 15         |
| LaCu <sub>0.5</sub> Fe <sub>0.5</sub> O <sub>3-6</sub>   | 0.088 mM (20 mg L <sup>-1</sup> ) | H <sub>2</sub> O <sub>2</sub> | 120 min       | 6.0 | 92.1%              | 16         |
| Fe <sub>3</sub> O <sub>4</sub> supported on coal fly ash | 0.22 mM (50 mg L <sup>-1</sup> )  | persulfate                    | 120 min       | 5.0 | 80.2%              | 17         |
| goethite                                                 | 0.1 mM (22.8 mg L <sup>-1</sup> ) | H <sub>2</sub> O <sub>2</sub> | 240 min       | 4.5 | 75.9%              | 18         |
| Fe <sub>2</sub> O <sub>3</sub> -in-CNT                   | 0.04 mM (9.1 mg L <sup>-1</sup> ) | H <sub>2</sub> O <sub>2</sub> | 180 min       | 6.8 | 85.7%              | 2          |
| MnO <sub>x</sub> -in-CNT                                 | 0.022 mM (5 mg L <sup>-1</sup> )  | H <sub>2</sub> O <sub>2</sub> | 120 min       | 6.5 | 93.3%              | this study |



**Table S3** Comparison of the performance of the proposed system with reported Mn-based catalysts.

| Materials                      | Pollutants    | Oxidant                       | pH      | Removal efficiency | References |
|--------------------------------|---------------|-------------------------------|---------|--------------------|------------|
| Mn <sub>3</sub> O <sub>4</sub> | bisphenol-AF  | persulfate                    | 7.0     | 90.0%              | 19         |
| Mn@porous carbon               | triclosan     | H <sub>2</sub> O <sub>2</sub> | 3.0     | 83.3%              | 20         |
| MnO <sub>2</sub> /CNTs         | phenol        | H <sub>2</sub> O <sub>2</sub> | natural | 90.0%              | 21         |
| Cu/MnO                         | benzotriazo   | H <sub>2</sub> O <sub>2</sub> | 7.13    | 89.0%              | 22         |
| MnO                            | ciprofloxacin | persulfate                    | 5.0     | 84.3%              | 23         |
| Mn <sub>2</sub> O <sub>3</sub> | ciprofloxacin | persulfate                    | 5.0     | 56.2%              | 23         |
| MnO <sub>x</sub> -in-CNT       | BPA           | H <sub>2</sub> O <sub>2</sub> | 6.5     | 93.3%              | this study |

**Table S4** Quality parameters of different water used for BPA removal by MnO<sub>x</sub>-in-CNT electro-Fenton system.

| Samples              | pH  | DO<br>(mg L <sup>-1</sup> ) | TOC<br>(mg L <sup>-1</sup> ) | Conductivity (μs<br>cm <sup>-1</sup> ) |
|----------------------|-----|-----------------------------|------------------------------|----------------------------------------|
| Tap water            | 7.1 | 9.2                         | 1.6                          | 513.4                                  |
| Lake water           | 7.6 | 8.6                         | 85.3                         | 675.6                                  |
| Secondary effluent   | 6.8 | 8.2                         | 135.7                        | 642.3                                  |
| Pharmaceutical water | 7.4 | 6.3                         | 261.6                        | 654.1                                  |

**Table S5** Chemicals used as model organic pollutants.

| Compounds | Structure                                                                           | CAS No.     | Formula                                                              | Industrial use                                      | Health risk                                     |
|-----------|-------------------------------------------------------------------------------------|-------------|----------------------------------------------------------------------|-----------------------------------------------------|-------------------------------------------------|
| BPA       | 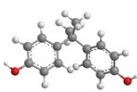   | 80-05-7     | C <sub>15</sub> H <sub>16</sub> O <sub>2</sub>                       | Producing plastics, polymers, and fine chemicals    | Endocrine disruption                            |
| 4-CP      |    | 106-48-9    | C <sub>6</sub> H <sub>5</sub> ClO                                    | Agricultural chemicals/dyes/drugs manufacturing     | Endocrine disruption and reproductive toxicity  |
| 2,4,6-TCP |    | 88-06-2     | C <sub>6</sub> H <sub>3</sub> Cl <sub>3</sub> O                      | Insecticide/fungicide/herbicide                     | Endocrine disruption and reproductive toxicity  |
| Phenol    |    | 108-95-2    | C <sub>6</sub> H <sub>6</sub> O                                      | Resins/fungicides/preservatives/drugs manufacturing | Threats to aquatic ecosystems                   |
| SMX       |    | 723-46-6    | C <sub>10</sub> H <sub>11</sub> N <sub>3</sub> O <sub>3</sub> S      | Antibiotic                                          | Threats to aquatic ecosystems                   |
| TC        |   | 60-54-8     | C <sub>22</sub> H <sub>24</sub> N <sub>2</sub> O <sub>8</sub>        | Antibiotic                                          | Damage to human health                          |
| LFX       |  | 100986-85-4 | C <sub>18</sub> H <sub>20</sub> FN <sub>3</sub> O <sub>4</sub>       | Antibiotic                                          | Threats to aquatic ecosystems                   |
| MB        |  | 7220-79-3   | C <sub>16</sub> H <sub>18</sub> ClN <sub>3</sub> S.3H <sub>2</sub> O | Dyes                                                | Toxic, carcinogenic, or mutagenic to life forms |
| RhB       |  | 547-58-0    | C <sub>28</sub> H <sub>31</sub> CIN <sub>2</sub> O <sub>3</sub>      | Dyes                                                | Toxic, carcinogenic, or mutagenic to life forms |
| Aniline   |  | 62-53-3     | C <sub>6</sub> H <sub>7</sub> N                                      | Dyes/pesticides/pharmaceutical compounds            | Carcinogen                                      |
| BA        |  | 65-85-0     | C <sub>7</sub> H <sub>6</sub> O <sub>2</sub>                         | Cosmetic/drugs/food industries                      | Threats to ecosystem and human health           |

Note: The compound geometries were drawn using Chem3D software (ChemOffice Professional 19.0). Gray = carbon, red = oxygen, white = hydrogen, blue = nitrogen, and green = chloride.

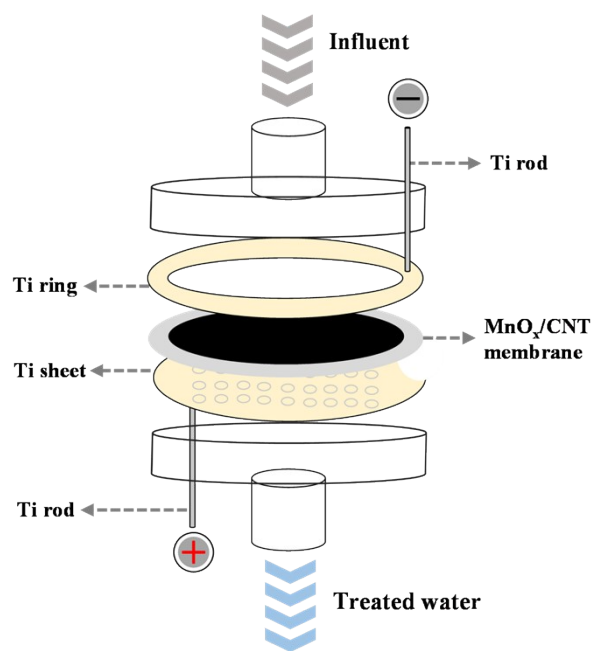

**Fig. S1** Schematic representation of the flow-through electroactive filtration reactor.

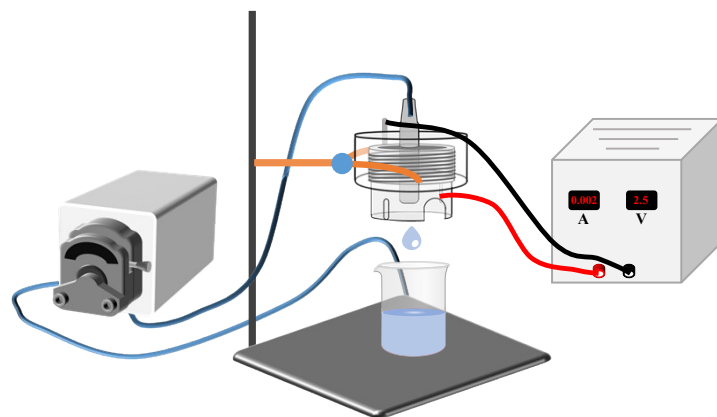

**Fig. S2** Schematic illustration of the flow-through electro-Fenton system.

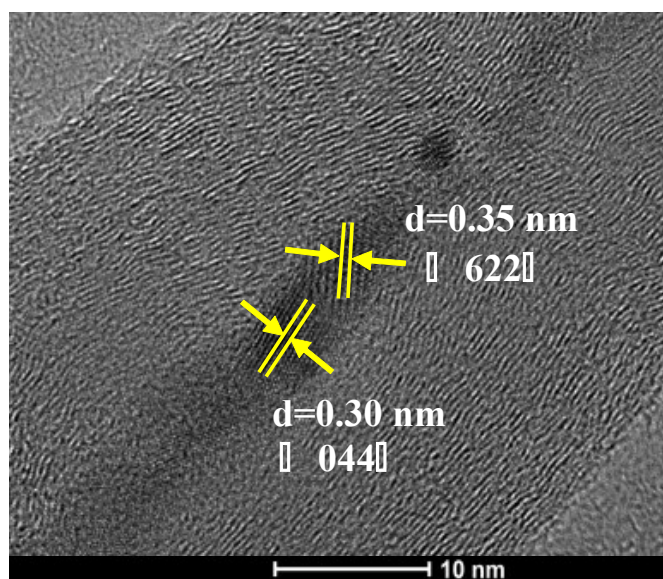

**Fig. S3** HRTEM image of  $\text{MnO}_x$ -in-CNT filter.

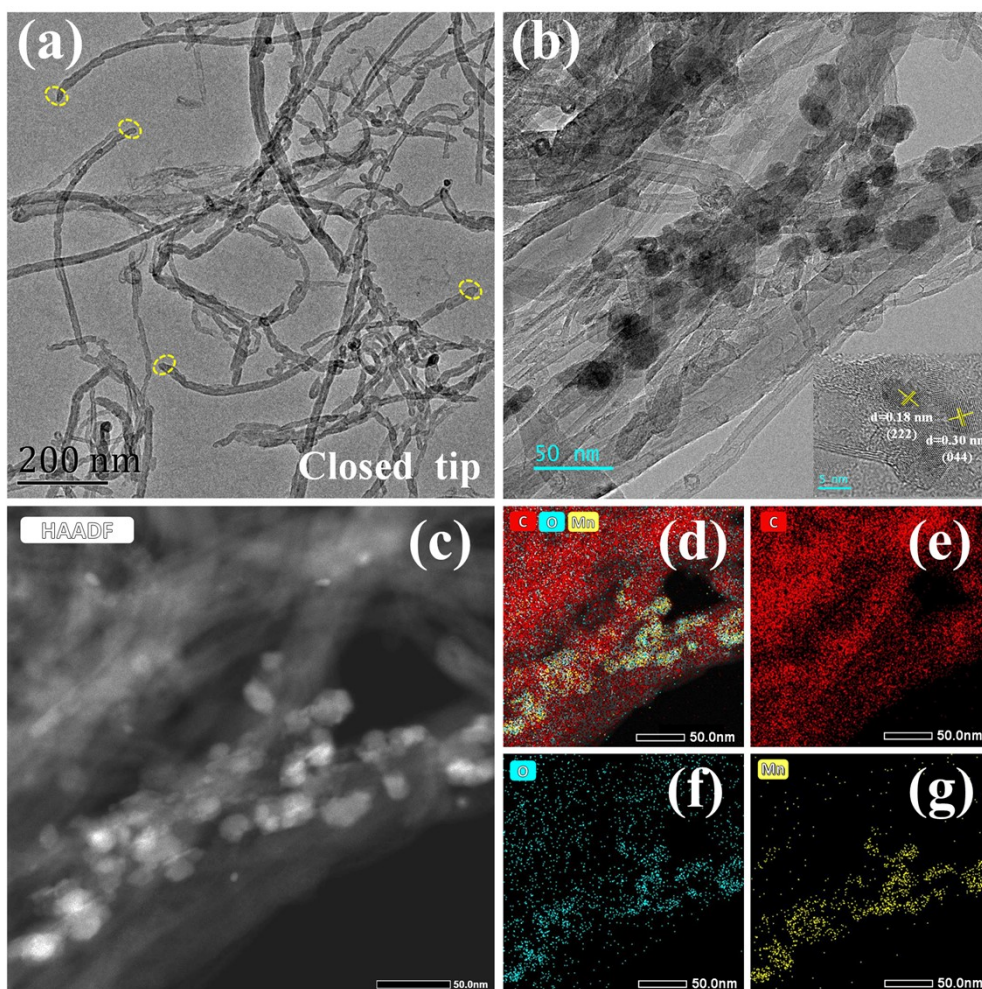

**Fig. S4** (a) TEM image of CNT with closed tip; (b) TEM image of MnO<sub>x</sub>-out-CNT filter (Inset) HRTEM image of MnO<sub>x</sub> nanoparticles; (c) HAADF-STEM image of MnO<sub>x</sub>-out-CNT filter; (d) EDS mapping pattern with C, O, and Mn elements overlapping together; EDS elemental mapping of (d) C, (e) O, and (f) Mn.

The HRTEM image (inset) illustrates two lattice stripe spacings of 0.18 and 0.30 nm, being in good agreement with the {222} and {044} crystal planes of Mn<sub>2</sub>O<sub>3</sub>, respectively.

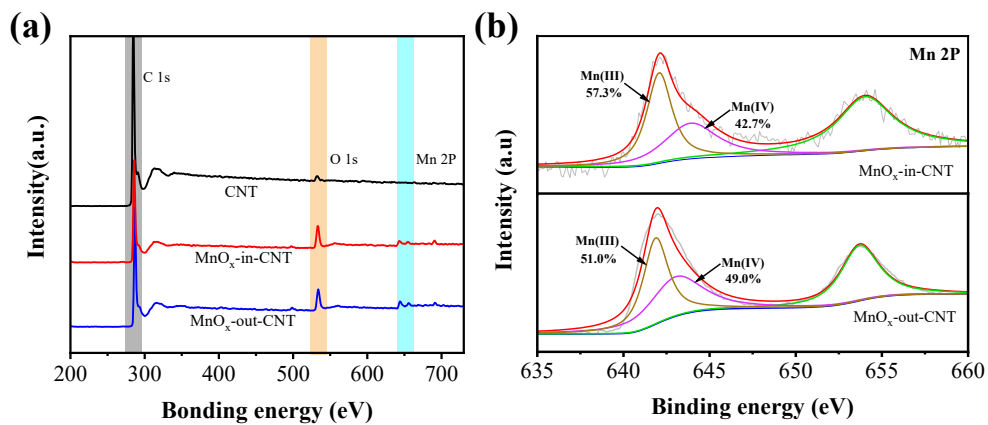

**Fig. S5** (a) XPS wide scan survey spectra and (b) high-resolution Mn 2p spectra of different catalysts.



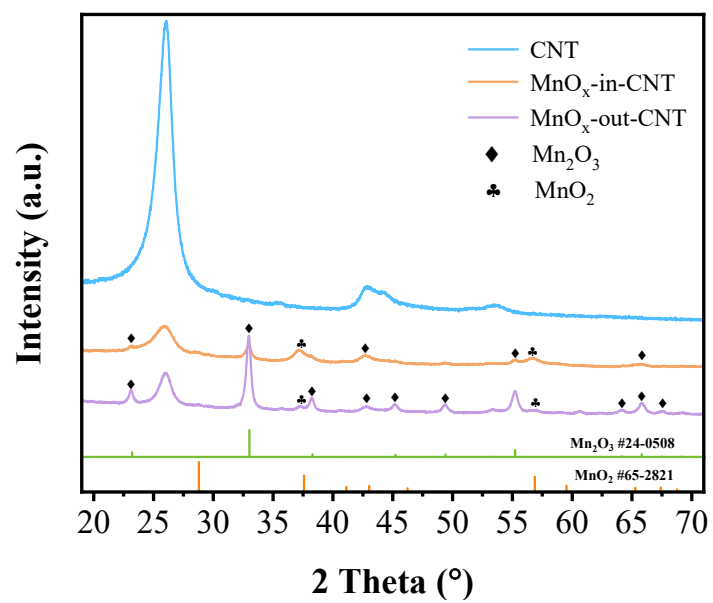

**Fig. S6** XRD patterns of CNT, MnO<sub>x</sub>-in-CNT, and MnO<sub>x</sub>-out-CNT.

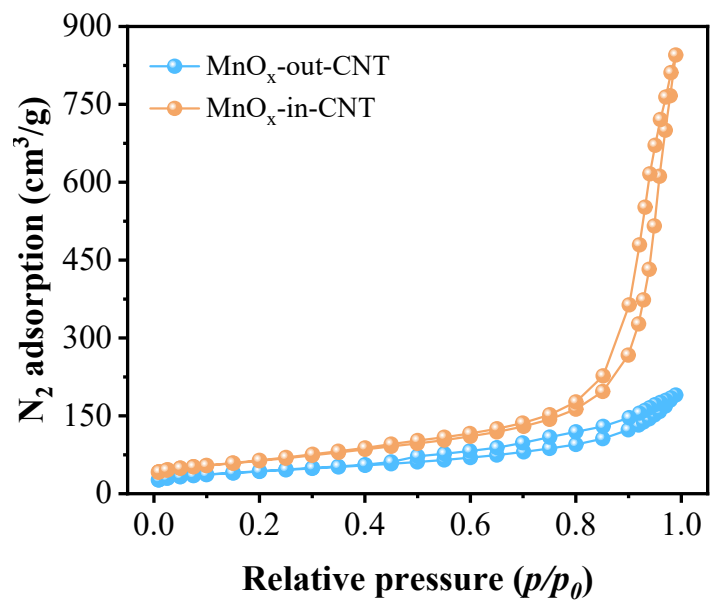

**Fig. S7** N<sub>2</sub> adsorption–desorption isotherms of MnO<sub>x</sub>-out-CNT and MnO<sub>x</sub>-in-CNT.

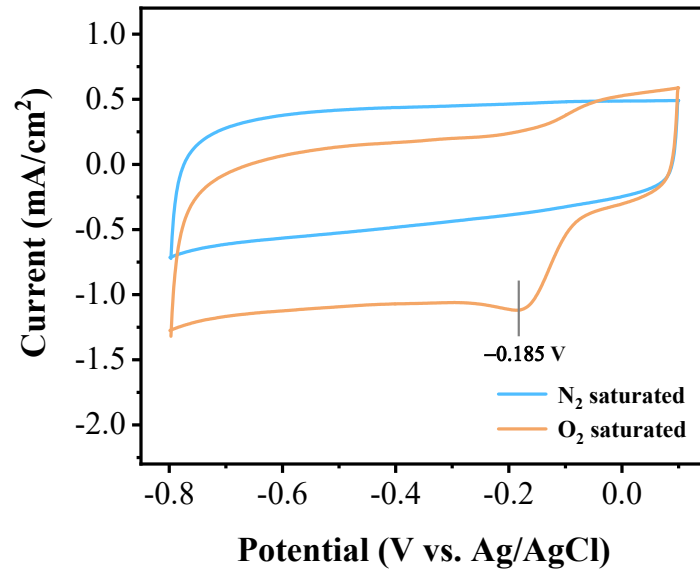

**Fig. S8** CV curves of CNT filter in O<sub>2</sub>- and N<sub>2</sub>-saturated 50 mM Na<sub>2</sub>SO<sub>4</sub> solution at pH 6.5 at a scan rate of 10 mV s<sup>-1</sup>.

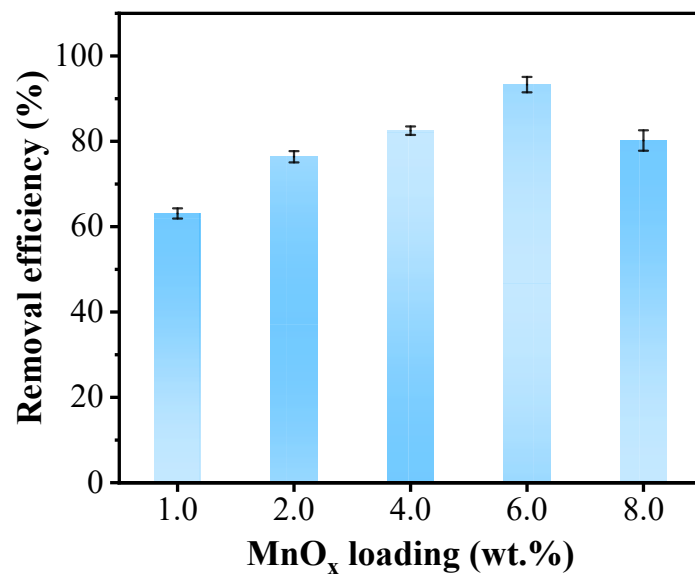

**Fig. S9** Effect of MnO<sub>x</sub> loading on BPA degradation. Experimental conditions: [BPA]<sub>0</sub> = 0.022 mM, [pH]<sub>0</sub> = 6.5, [DO]<sub>0</sub> = 38.3 ± 1.6 mg L<sup>-1</sup>, flow rate = 1.5 mL min<sup>-1</sup>, and [Na<sub>2</sub>SO<sub>4</sub>] = 10 mM.

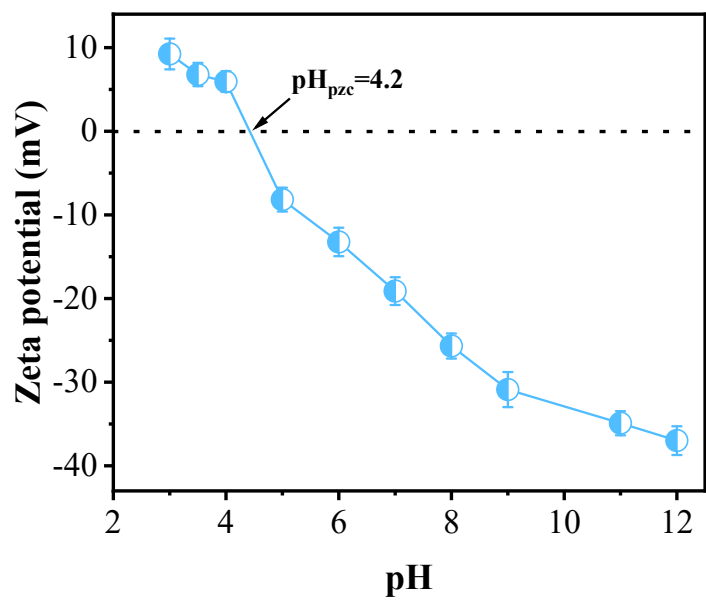

**Fig. S10** Zeta potential of  $\text{MnO}_x$  versus solution pH.

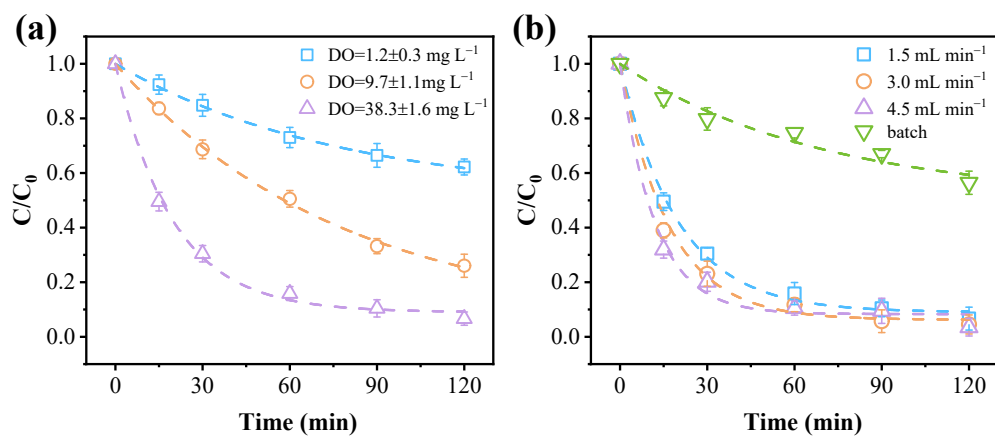

**Fig. S11** Effect of (a) DO and (b) flow rate on BPA degradation. Experimental conditions:  $[\text{BPA}]_0 = 0.022 \text{ mM}$ ,  $[\text{pH}]_0 = 6.5$ , and  $[\text{Na}_2\text{SO}_4] = 10 \text{ mM}$ .

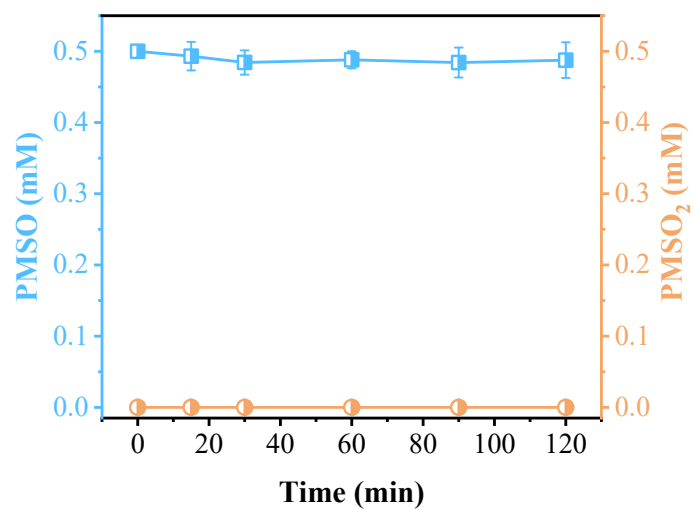

**Fig. S12** Decline of PMSO and production of PMSO<sub>2</sub> in the MnOx-in-CNT electro-Fenton system. Experimental conditions: [PMSO]<sub>0</sub> = 0.5 mM, [pH]<sub>0</sub> = 6.5, [DO]<sub>0</sub> = 38.3 ± 1.6 mg L<sup>-1</sup>, flow rate = 1.5 mL min<sup>-1</sup>, and [Na<sub>2</sub>SO<sub>4</sub>] = 10 mM.

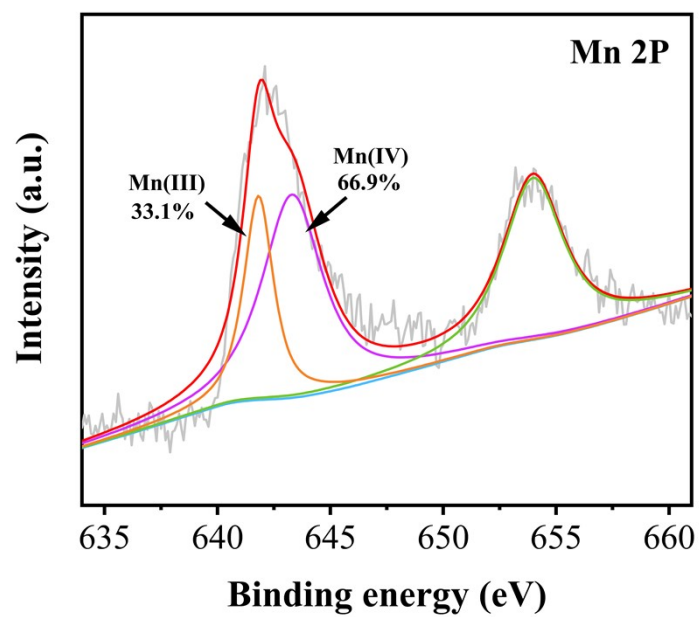

**Fig. S13** XPS spectrogram and the fitting peak of Mn 2p of after used  $\text{MnO}_x$ -in-CNT filter.



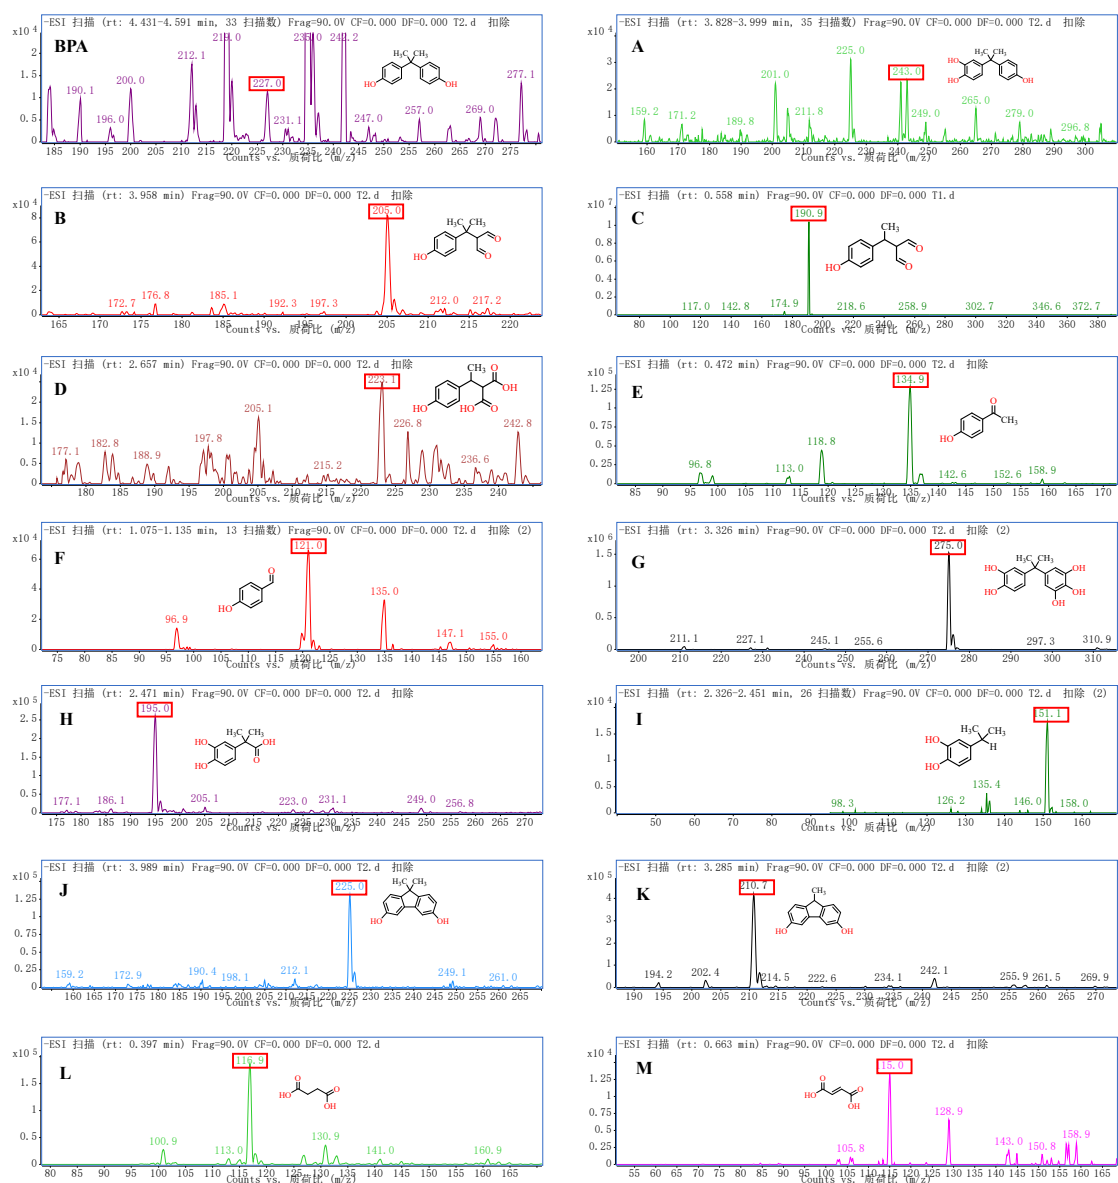

**Fig. S14** Mass spectrum of BPA and intermediates during the BPA removal in MnO<sub>x</sub>-in-CNT electro-Fenton system.

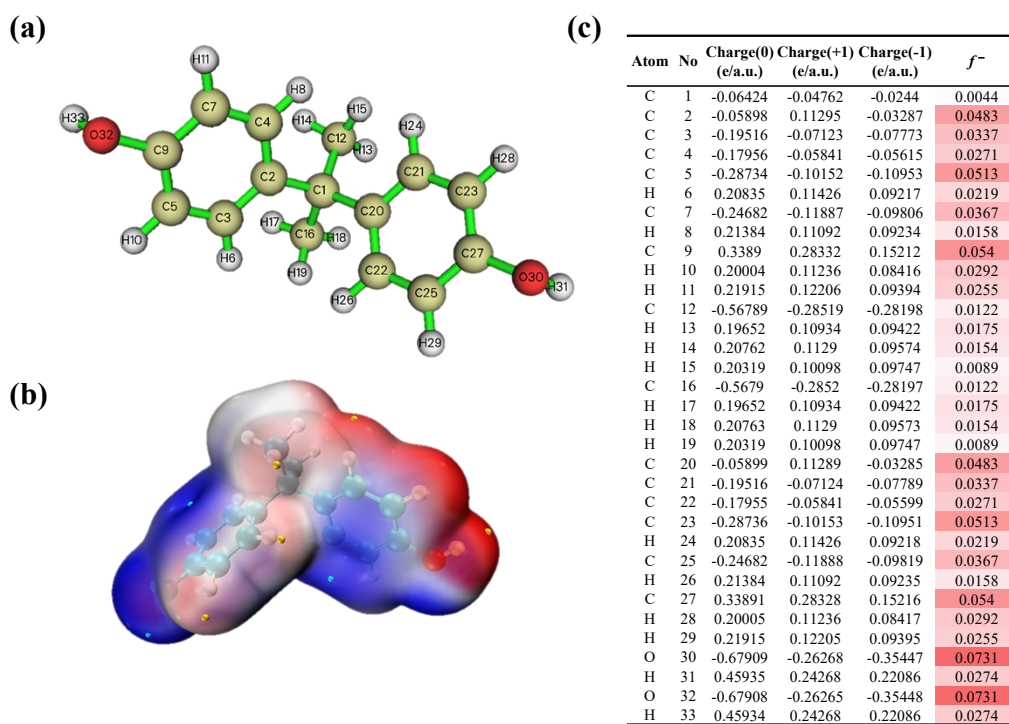

**Fig. S15** (a) The geometrical structure of BPA, (b) electrostatic potential (ESP) map of BPA, and (c) natural population analysis (NPA) charge distribution and Fukui index of BPA.

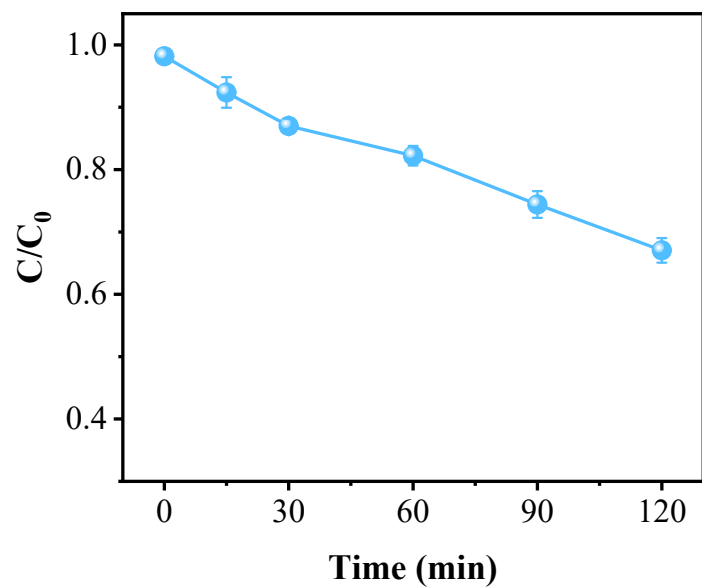

**Fig. S16** TOC removal in the MnO<sub>x</sub>-in-CNT electro-Fenton system. Experimental conditions: [BPA]<sub>0</sub> = 0.022 mM, [pH]<sub>0</sub> = 6.5, voltage = -2.5 V, [DO]<sub>0</sub> = 38.3 ± 1.6 mg L<sup>-1</sup>, [Na<sub>2</sub>SO<sub>4</sub>] = 10 mM, and flow rate = 1.5 mL min<sup>-1</sup>.

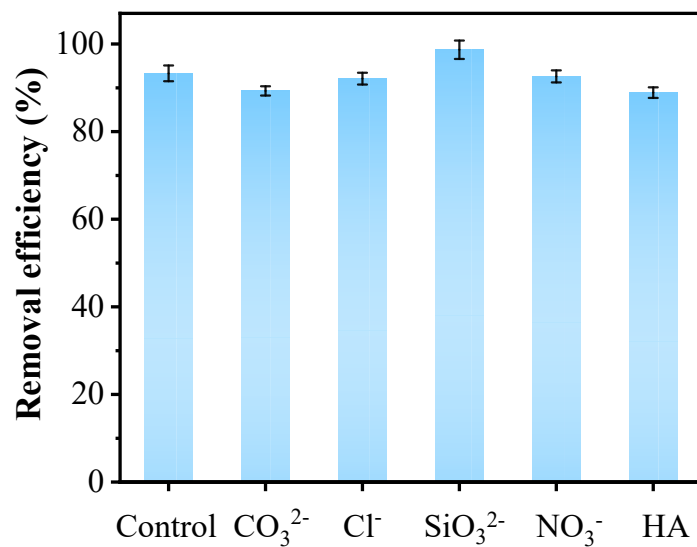

**Fig. S17** Effect of co-existing substrates on the degradation of BPA by MnO<sub>x</sub>-in-CNT electro-Fenton system. Experimental conditions: [BPA]<sub>0</sub> = 0.022 mM, [pH]<sub>0</sub> = 6.5, voltage = -2.5 V, [CO<sub>3</sub><sup>2-</sup>, Cl<sup>-</sup>, SiO<sub>3</sub><sup>2-</sup>, NO<sub>3</sub><sup>-</sup>] = 10.0 mM, and [HA] = 5.0 mg L<sup>-1</sup>, [DO]<sub>0</sub> = 38.3 ± 1.6 mg L<sup>-1</sup>, [Na<sub>2</sub>SO<sub>4</sub>] = 10 mM, and flow rate = 1.5 mL min<sup>-1</sup>.

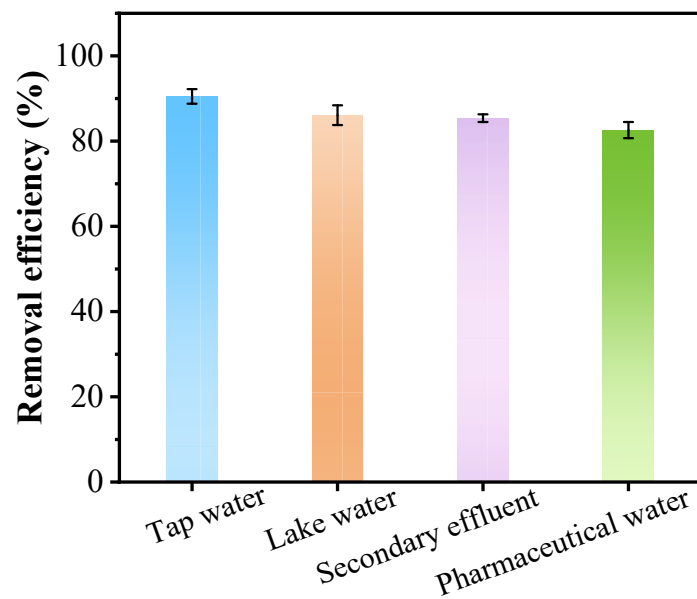

**Fig. S18** Effect of different water matrices on the degradation of BPA by  $\text{MnO}_x$ -in-CNT electro-Fenton system. Experimental conditions:  $[\text{BPA}]_0 = 0.022 \text{ mM}$ ,  $[\text{pH}]_0 = 6.5$ , voltage =  $-2.5 \text{ V}$ ,  $[\text{DO}]_0 = 38.3 \pm 1.6 \text{ mg L}^{-1}$ ,  $[\text{Na}_2\text{SO}_4] = 10 \text{ mM}$ , and flow rate =  $1.5 \text{ mL min}^{-1}$ .

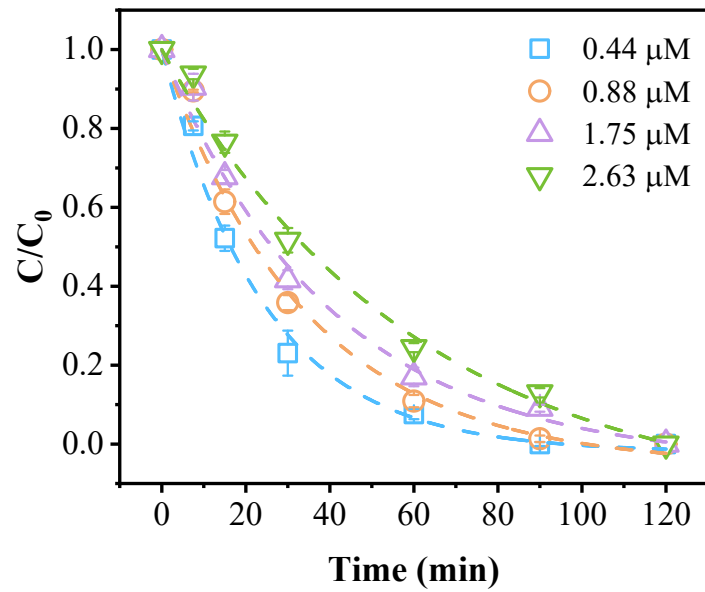

**Fig. S19** The performance of trace BPA degradation in the  $\text{MnO}_x$ -in-CNT electro-Fenton system. Experimental conditions:  $[\text{pH}]_0 = 6.5$ , voltage =  $-2.5 \text{ V}$ ,  $[\text{DO}]_0 = 38.3 \pm 1.6 \text{ mg L}^{-1}$ ,  $[\text{Na}_2\text{SO}_4] = 10 \text{ mM}$ , and flow rate =  $1.5 \text{ mL min}^{-1}$ .

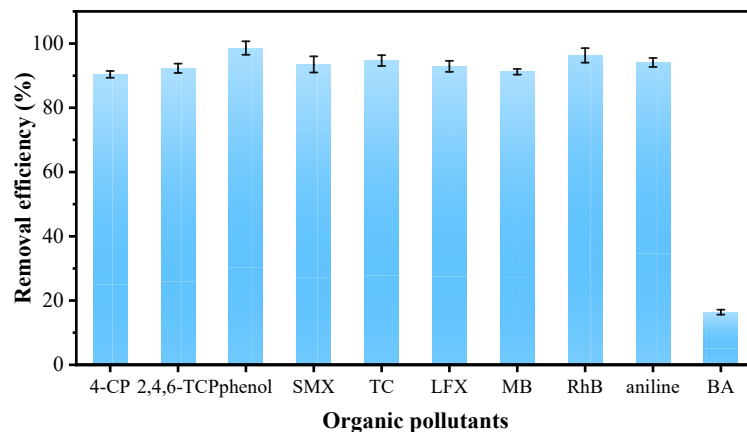

**Fig. S20** Degradation of various organic pollutants in the  $\text{MnO}_x$ -in-CNT electro-Fenton system. Experimental conditions:  $[4\text{-CP}]_0 = [2,4,6\text{-TCP}]_0 = [\text{phenol}]_0 = [\text{SMX}]_0 = [\text{LFX}]_0 = [\text{TC}]_0 = [\text{MB}]_0 = [\text{RhB}]_0 = [\text{aniline}]_0 = [\text{BA}]_0 = 0.022 \text{ mM}$ ,  $[\text{pH}]_0 = 6.5$ , voltage =  $-2.5 \text{ V}$ ,  $[\text{DO}]_0 = 38.3 \pm 1.6 \text{ mg L}^{-1}$ ,  $[\text{Na}_2\text{SO}_4] = 10 \text{ mM}$ , and flow rate =  $1.5 \text{ mL min}^{-1}$ .

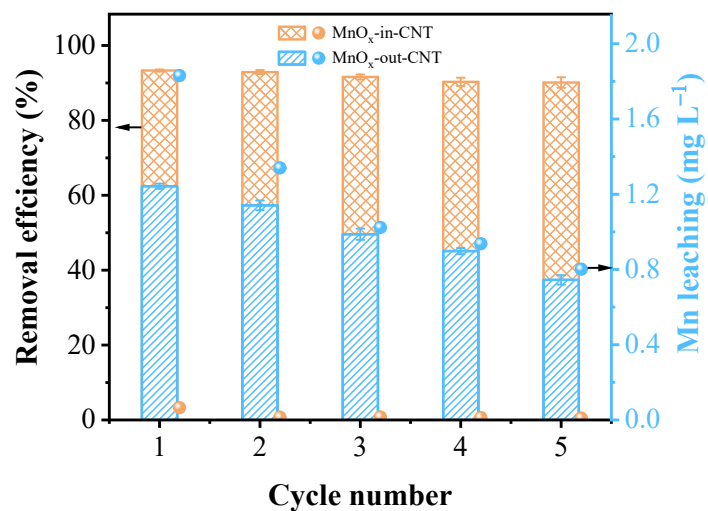

**Fig. S21** A comparison of BPA degradation stability and leached total Mn concentration of the MnO<sub>x</sub>-in-CNT or MnO<sub>x</sub>-out-CNT electro-Fenton system. Experimental conditions: [BPA]<sub>0</sub> = 0.022 mM, [pH]<sub>0</sub> = 6.5, voltage = -2.5 V, [DO]<sub>0</sub> = 38.3 ± 1.6 mg L<sup>-1</sup>, [Na<sub>2</sub>SO<sub>4</sub>] = 10 mM, and flow rate = 1.5 mL min<sup>-1</sup>.



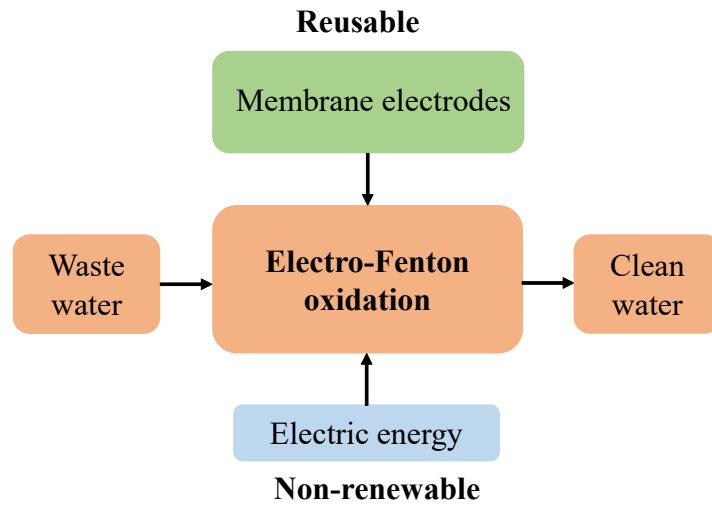

**Fig. S22** Flow path of the MnO<sub>x</sub>-in-CNT electro-Fenton system.

## References

- 1 W. Chen, Z. Fan, L. Gu, X. Bao and C. Wang, *Chem. Commun.*, 2010, **46**, 3905-3907.
- 2 D. L. Guo, Y. B. Liu, H. D. Ji, C. C. Wang, B. Chen, C. S. Shen, F. Li, Y. X. Wang, P. Lu and W. Liu, *Environ. Sci. Technol.*, 2021, **55**, 4045-4053.
- 3 J. Hutter, M. Iannuzzi, F. Schiffmann and J. VandeVondele, *Wires Comput. Mol. Sci.*, 2014, **4**, 15-25.
- 4 M. Ernzerhof and G. E. Scuseria, *J Chem. Phys.*, 1999, **110**, 5029-5036.
- 5 S. E. Boulfelfel, P. I. Ravikovitch, L. Koziol and D. S. Sholl, *J. Phys. Chem. C*, 2016, **120**, 14140-14148.
- 6 S. Grimme, *J Comput. Chem.*, 2006, **27**, 1787-1799.
- 7 J. P. Perdew, A. Ruzsinszky, J. M. Tao, V. N. Staroverov, G. E. Scuseria and G. I. Csonka, *J Chem. Phys.*, 2005, **123**, 062201.
- 8 T. Lu and F. W. Chen, *J Comput. Chem.*, 2012, **33**, 580-592.
- 9 C. Flox, P. L. Cabot, F. Centellas, J. A. Garrido, R. M. Rodriguez, C. Arias and E. Brillas, *Appl. Catal., B*, 2007, **75**, 17-28.
- 10 Y. Ren, M. Q. Shi, W. M. Zhang, D. D. Dionysiou, J. H. Lu, C. Shan, Y. Y. Zhang, L. Lv and B. C. Pan, *Environ. Sci. Technol.*, 2020, **54**, 5258-5267.
- 11 Q. X. Zhou, A. Xing, J. Li, D. C. Zhao, K. F. Zhao and M. Lei, *Electrochim. Acta*, 2016, **209**, 379-388.
- 12 D. D. Bezerra, R. J. Franca and M. R. D. Marques, *Catal. Letters*, 2021, **151**, 1477-1487.
- 13 J. Hu, X. K. Zeng, G. Wang, B. B. Qian, Y. Liu, X. Y. Hu, B. He, L. Zhang and X. W. Zhang, *Chem. Eng. J.*, 2020, **400**, 125869.
- 14 L. L. Zhang, D. A. Xu, C. Hu and Y. L. Shi, *Appl. Catal., B*, 2017, **207**, 9-16.
- 15 Y. Wang, J. Li, J. Y. Sun, Y. B. Wang and X. Zhao, *J. Mater. Chem. A*, 2017, **5**, 19151-19158.
- 16 K. L. Pan, C. Z. Yang, J. P. Hu, W. L. Yang, B. C. Liu, J. K. Yang, S. Liang, K. K. Xiao and H. J. Hou, *J. Hazard. Mater.*, 2020, **389**, 122072.
- 17 X. M. Xu, S. Y. Zong, W. M. Chen and D. Liu, *Chem. Eng. J.*, 2019, **369**, 470-479.

- 18 J. F. Ding, L. L. Shen, R. P. Yan, S. H. Lu, Y. N. Zhang, X. F. Zhang and H. J. Zhang, *Chemosphere*, 2020, **261**, 127715.
- 19 N. R. Wang, J. Zhang, Y. L. Zhang, P. Zhou, J. Q. Wang and Y. Liu, *Chemosphere*, 2021, **263**, 127950.
- 20 X. L. Zhou, D. Xu, Y. C. Chen and Y. Y. Hu, *Chem. Eng. J.*, 2020, **384**, 123324.
- 21 C. Qu, Y. G. Li, S. J. Meng, X. H. Li, S. J. Zhang and D.-W. Liang, *J. Hazard. Mater.*, 2022, **434**, 128923.
- 22 Y. T. Zhang, C. Liu, B. B. Xu, F. Qi and W. Chu, *Appl. Catal., B*, 2016, **199**, 447-457.
- 23 Y. Chi, P. Wang, M. Lin, C. Lin, M. Gao, C. L. Zhao and X. Wu, *Chemosphere*, 2022, **299**, 134437.
